# Supplementary material
Source: publisher site journal article supplement (https://www.dovepress.com/article/411928)
Supplement: Supplementary file 1 [file get_supplementary_file.php]

**SUPPLEMENTAL MATERIAL**

**Supplemental Table 1. Respondent demographics: sensitivity analysis**

| Demographic                    | Total<br>(N=1853) | Underweight/Normal<br>Weight (n=551) | Overweight<br>(n=472) | Obese Class 1<br>(n=399) | Obese Class 2<br>(n=194) | Obese Class 3<br>(n=237) |
|--------------------------------|-------------------|--------------------------------------|-----------------------|--------------------------|--------------------------|--------------------------|
| Age, mean (SD), years          | 34.1 (12.6)       | 33.6 (12.9)                          | 34.8 (12.1)           | 34.2 (13.2)              | 34.1 (12.4)              | 34.0 (12.3)              |
| Sex, female, n (%)             | 1212 (65)         | 364 (66)                             | 274 (58)              | 247 (62)                 | 143 (74)                 | 184 (78)                 |
| Race, n (%)                    |                   |                                      |                       |                          |                          |                          |
| White                          | 1144 (62)         | 320 (58)                             | 276 (58)              | 263 (66)                 | 135 (70)                 | 150 (63)                 |
| Black                          | 179 (10)          | 49 (9)                               | 43 (9)                | 32 (8)                   | 17 (9)                   | 38 (16)                  |
| Hispanic                       | 310 (17)          | 96 (17)                              | 91 (19)               | 66 (17)                  | 30 (15)                  | 27 (11)                  |
| Other                          | 220 (12)          | 86 (16)                              | 62 (13)               | 38 (10)                  | 12 (6)                   | 22 (9)                   |
| Married, n (%)                 | 833 (45)          | 241 (44)                             | 220 (47)              | 192 (48)                 | 79 (41)                  | 101 (43)                 |
| Employed, n (%)                | 849 (46)          | 277 (50)                             | 225 (48)              | 183 (46)                 | 84 (43)                  | 80 (34)                  |
| On disability, n (%)           | 356 (19)          | 65 (12)                              | 89 (19)               | 75 (19)                  | 46 (24)                  | 81 (34)                  |
| Income <\$25,000, n (%)        | 709 (38)          | 206 (37)                             | 173 (37)              | 158 (40)                 | 70 (36)                  | 102 (43)                 |
| Drinks alcohol, n (%)          | 1174 (63)         | 364 (66)                             | 308 (65)              | 244 (61)                 | 123 (63)                 | 135 (57)                 |
| Current smoker, n (%)          | 843 (45)          | 290 (53)                             | 206 (44)              | 177 (44)                 | 72 (37)                  | 98 (41)                  |
| Trying to lose weight, n (%)   | 929 (50)          | 132 (24)                             | 253 (54)              | 253 (63)                 | 136 (70)                 | 155 (65)                 |
| Exercised in past month, n (%) | 1059 (57)         | 347 (63)                             | 287 (61)              | 210 (53)                 | 113 (58)                 | 102 (43)                 |

**Supplemental Table 2. Adjusted health-related quality of life and work productivity scores<sup>a</sup>: sensitivity analysis**

| Parameter                            | Underweight/Normal Weight (n=551) | Overweight (n=472) | Obese Class 1 (n=399) | Obese Class 2 (n=194) | Obese Class 3 (n=237) |
|--------------------------------------|-----------------------------------|--------------------|-----------------------|-----------------------|-----------------------|
| SF-36v2, <sup>b</sup> mean (SEM)     |                                   |                    |                       |                       |                       |
| PCS score                            | 44.3 (0.75)                       | 42.6 (0.78)        | 42.2 (0.79)           | 40.6 (0.95)           | 38.0 (0.89)           |
| MCS score                            | 32.8 (0.94)                       | 32.0 (0.99)        | 31.6 (1.00)           | 31.7 (1.20)           | 32.4 (1.12)           |
| EQ-5D score, <sup>b</sup> mean (SEM) | 0.67 (0.01)                       | 0.65 (0.01)        | 0.64 (0.01)           | 0.63 (0.02)           | 0.59 (0.02)           |
| WPAI score, <sup>c,d</sup> % (SEM)   |                                   |                    |                       |                       |                       |
| Absenteeism                          | 37.5 (4.79)                       | 32.0 (4.69)        | 34.9 (4.82)           | 38.3 (6.69)           | 39.2 (7.10)           |
| Presenteeism                         | 56.2 (4.12)                       | 52.7 (4.14)        | 56.6 (4.56)           | 54.8 (5.24)           | 56.0 (5.62)           |
| Overall work impairment              | 64.4 (1.06)                       | 59.0 (1.06)        | 64.2 (1.17)           | 62.4 (1.37)           | 66.4 (1.49)           |
| Activity impairment                  | 57.9 (2.41)                       | 58.7 (2.58)        | 60.8 (2.71)           | 60.9 (3.26)           | 65.2 (3.21)           |

<sup>a</sup>Adjusted for age, sex, race, residential status, marital status, education, employment status, insurance status, smoking status, alcohol use, exercise frequency, modified Charlson Comorbidity Index score, and NHWS year.

<sup>b</sup>Lower scores represent worse health status.

<sup>c</sup>A total of 807 respondents (n=263 underweight/normal weight; n=213 overweight; n=173 obese class 1; n=81 obese class 2; n=77 obese class 3) who were employed at the time of the NHWS completed the absenteeism, presenteeism, and overall work impairment scales; all respondents (n=1853) completed the activity impairment scale.

<sup>d</sup>Higher scores represent greater impairment.

BMI, body mass index; MCS, Mental Component Summary; NHWS, National Health and Wellness Survey; PCS, Physician Component Summary; SF-36v2, 36-item Short Form Version 2; WPAI, Work Productivity and Activity Impairment.

**Supplemental Table 3. Adjusted health care resource use, previous 6 months<sup>a</sup>: sensitivity analysis**

| Resource                      | Underweight/Normal Weight (n=551) | Overweight (n=472) | Obese Class 1 (n=399) | Obese Class 2 (n=194) | Obese Class 3 (n=237) |
|-------------------------------|-----------------------------------|--------------------|-----------------------|-----------------------|-----------------------|
| Hospitalizations, mean (SEM)  | 0.81 (0.16)                       | 0.72 (0.15)        | 0.71 (0.15)           | 1.08 (0.27)           | 0.92 (0.22)           |
| ED visits, mean (SEM)         | 1.23 (0.19)                       | 1.44 (0.23)        | 1.45 (0.24)           | 1.97 (0.39)           | 1.50 (0.28)           |
| Visits to any HCP, mean (SEM) | 9.64 (0.84)                       | 12.49 (1.14)       | 11.66 (1.09)          | 12.26 (1.37)          | 13.21 (1.37)          |

<sup>a</sup>Adjusted for age, sex, race, residential status, marital status, education, employment status, insurance status, smoking status, alcohol use, exercise frequency, modified Charlson Comorbidity Index score, and NHWS year.

ED, emergency department; HCP, health care professional; NHWS, National Health and Wellness Survey.

**Supplemental Figure 1. Adjusted proportions of self-reported obesity-related medical comorbidities.**

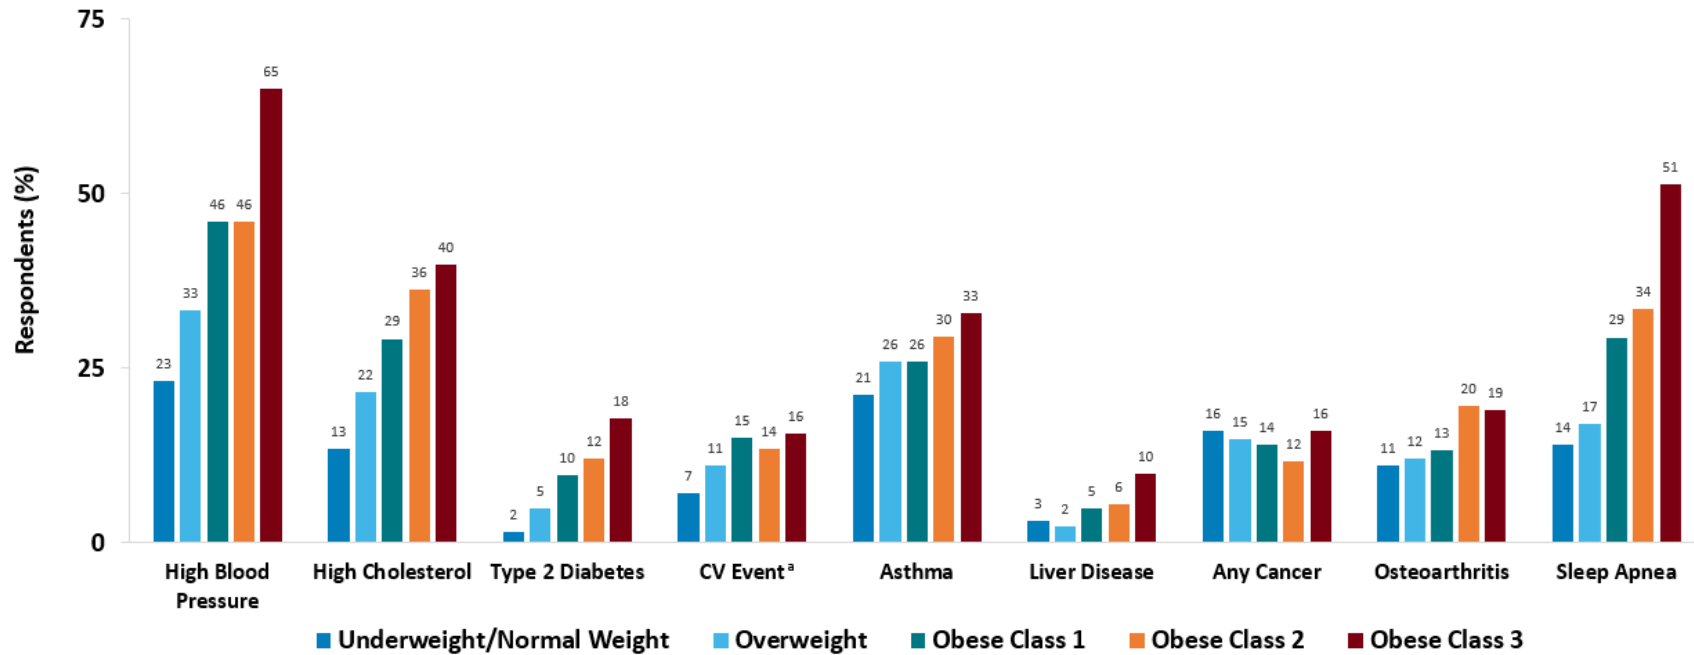

Adjusted for age, sex, race, residential status, marital status, education, employment status, insurance status, smoking status, alcohol use, exercise frequency, modified Charlson Comorbidity Index score, and NHWS year.

<sup>a</sup>Includes ministroke, stroke, heart attack, or congestive heart failure.

BMI, body mass index; CV, cardiovascular; NHWS, National Health and Wellness Survey.

**Supplemental Figure 2. Adjusted direct and indirect costs (in USD), annualized: sensitivity analysis.**

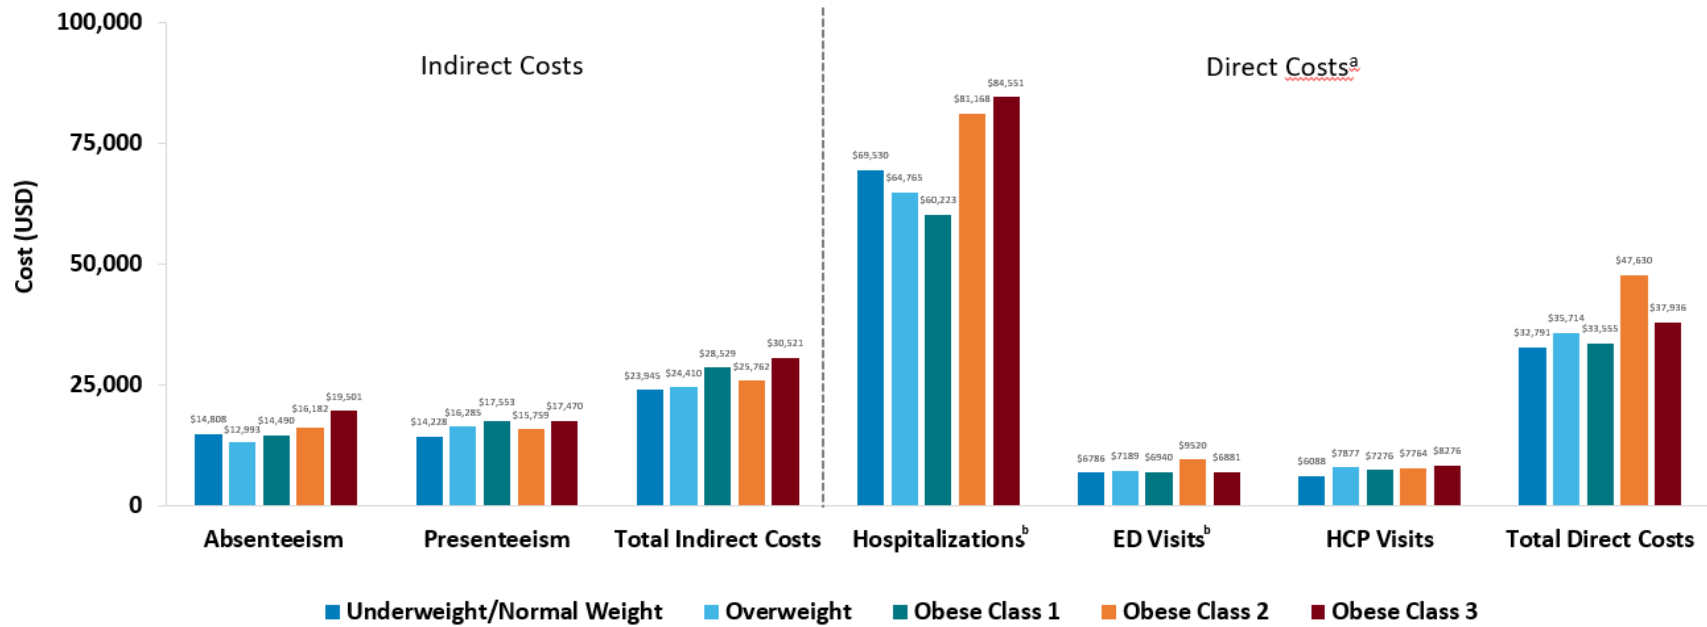

Adjusted for age, sex, race, residential status, marital status, education, employment status, insurance status, smoking status, alcohol use, exercise frequency, modified Charlson Comorbidity Index, and NHWS year.

<sup>a</sup>Analyzed using a generalized linear model with a negative binomial distribution.

<sup>b</sup>Analyzed using a zero-inflated model with a negative binomial distribution.

BMI, body mass index; ED, emergency department; HCP, health care professional; NHWS, National Health and Wellness Survey; USD, US dollars.
